## RESEARCH REPORT

# Retinoic acid signaling regulates development of the dorsal forebrain midline and the choroid plexus in the chick

Sandeep Gupta and Jonaki Sen\*

**ABSTRACT**

The developing forebrain roof plate (RP) contains a transient signaling center, perturbations in which have been linked to holoprosencephaly (HPE). Here, we describe a novel domain of retinoic acid (RA) signaling that is specific to the chick RP and demonstrate that RA signaling is sufficient for inducing characteristics of the RP in ectopic locations. We further demonstrate that, unlike what has been observed in the mouse, RA signaling is essential for invagination of the RP in chick, failure of which leads to an HPE-like phenotype. In addition, we found that RA exerts a negative influence on choroid plexus differentiation. Thus, our findings identify RA as a novel regulator of chick forebrain RP development.

**KEY WORDS:** Retinoic acid, Forebrain roof plate, Invagination, Choroid plexus, Chick

**INTRODUCTION**

The formation of two cerebral hemispheres from a single telencephalic vesicle in vertebrates begins with the process of invagination in the forebrain roof plate (RP). This process is tightly regulated both spatially and temporally, and any perturbation results in severe congenital anomalies, including holoprosencephaly (HPE) (Klingensmith et al., 2010; Roessler and Muenke, 2010). A signaling center located in the RP of the dorsal telencephalon patterns the dorsal forebrain along the medial-lateral (M-L) axis resulting in the development of the choroid plexus (ChP) medially and the hippocampus laterally (Currel et al., 2005; Cheng et al., 2006). This is achieved through the expression of specific signaling molecules in the dorsal forebrain, such as FGFs, BMPs and Wnts (Furuta et al., 1997; Grove et al., 1998; Crossley et al., 2001). In addition, transcription factors such as Six3, Tgif, Gli3 and Zic2, which are expressed by the RP, have also been implicated as regulators of dorsal forebrain development (Theil et al., 1999; Wallis et al., 1999; Warr et al., 2008; Taniguchi et al., 2012). Perturbation in the activity of these signaling molecules and transcription factors adversely affect the development of the dorso-medial forebrain-derived structures and may also lead to HPE.

Although several molecules have been implicated as regulators of dorsal forebrain development, there are likely to be other molecules that regulate this process. One such candidate is retinoic acid (RA), a known developmental regulator of many tissues and organs, including the forebrain (Halilagic et al., 2003, 2007). Initial studies, where pan-RA receptor antagonist-soaked beads were implanted in the forebrain of early chick embryos, resulted in

dramatic abnormalities due to disturbed anterior-posterior (A-P) patterning and reduced cell survival (Schneider et al., 2001). Similar patterning defects were found in VAD quail embryos (Halilagic et al., 2003, 2007). However, mice with genetic deletions of RA-synthesizing enzymes did not exhibit defects in forebrain A-P patterning (Molotkova et al., 2007; Chatzi et al., 2013) but instead displayed abnormalities in optic vesicle and craniofacial development (Mic et al., 2004; Halilagic et al., 2007), as well as defects in development of the LGE-derived dopaminergic neurons (Molotkova et al., 2007).

In previous studies, RA signaling was manipulated from the earliest stage, precluding the discovery of later roles of RA in forebrain development. Furthermore, there was a lack of understanding about the specific developmental processes regulated by RA in this context. Thus, our discovery of a specific domain of RA signaling in the center of the forebrain RP motivated us to investigate additional role(s) of RA signaling during forebrain development. Here, we demonstrate that RA signaling is necessary for invagination of the forebrain RP in chick and there is a negative influence of RA signaling on ChP development. Thus, through this study we have uncovered temporally distinct roles of RA signaling in the developing chick forebrain.

**RESULTS AND DISCUSSION****A restricted domain of RA signaling in the center of the chick forebrain roof plate**

In many developmental contexts, a source of RA (RA-synthesizing enzyme) and a sink of RA (RA-degrading enzyme) are in close proximity (Swindell et al., 1999). To investigate comprehensively the function(s) of RA during forebrain development, we first sought to identify the source(s) and sink(s) of RA in the developing chick forebrain between HH18 and HH22. Among the three RA-synthesizing enzymes (Raldh1, Raldh2 and Raldh3), we found that only Raldh2 was expressed in the mesenchyme overlying the dorsal forebrain at HH20 and HH22 (Fig. 1A'-C'). Furthermore, we observed that Raldh2 was expressed in an anterior-low to posterior-high gradient in the forebrain at HH22 (Fig. 1E-G). Among the three RA-degrading enzymes (Cyp26a1, Cyp26b1, Cyp26c1), two, namely Cyp26a1 and Cyp26c1, were expressed in bilateral domains flanking the center of the invaginating RP (Fig. 1A''-C''; supplementary material Fig. S1A,B). The temporal and spatial expression pattern of Cyp26a1 (Fig. 1A''-C'',I-K, red arrowheads) was very similar to that of Raldh2 (Fig. 1A'-C',E-G, red arrowheads). Based on the juxtaposed expression domains of Raldh2 and Cyp26a1, we hypothesized that a narrow domain of RA signaling is likely to exist at the center of the invaginating RP. Indeed, when we electroporated the RA reporter construct pRARE-AP (see methods in the supplementary material) in the dorsal chick forebrain we observed alkaline phosphatase (AP) activity specifically in the center of the RP at HH22 (Fig. 1O, yellow arrowheads), whereas there was none within the region

Department of Biological Sciences and Bioengineering, Indian Institute of Technology Kanpur, Kanpur, Uttar Pradesh 208016, India.

\*Author for correspondence (jonaki@iitk.ac.in)

Received 21 January 2015; Accepted 5 February 2015

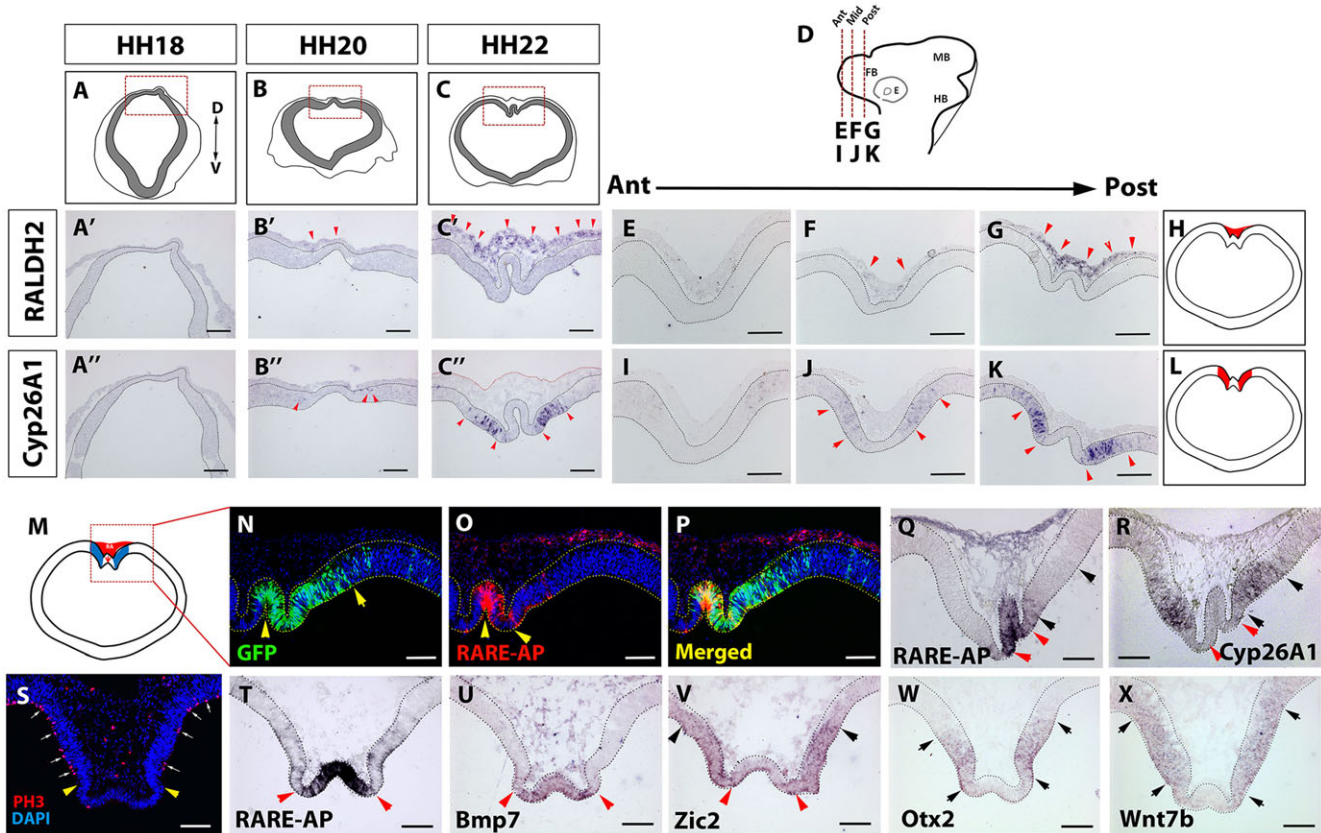

**Fig. 1. Identification of the RA signaling domain in the chick forebrain RP.** Expression (red arrowheads) of *Raldh2* and *Cyp26a1* in dorsal forebrain at HH18 (A', A''), HH20 (B', B'') and HH22 (C', C'') and in the anterior (E, I), middle (F, J) and posterior (G, K) sections of the HH22 forebrain. The boxed regions in the schematics A-C, H, L (red shows expression pattern) correspond to the images A'-C'', G, K, respectively. (D) Plane of sections in the HH22 chick head. (M) Schematic of coronal section of HH22 forebrain electroporated with pRARE-AP. Images from the boxed region depicting GFP (N, arrowheads), AP (O, pseudocolored red, arrowheads) and merged GFP and AP (P). Expression domains of *Cyp26a1*, *Bmp7*, *Zic2*, *Wnt7b*, *Otx2* (R, U-X) and region of cell proliferation (S, arrows) and RA activity (Q, T, red arrowheads). Scale bars: 100  $\mu$ m.

expressing *Cyp26a1* (Fig. 1N, yellow arrowheads; Fig. 1R, black arrowheads). At later stages, such as HH24, AP activity was also found to be restricted to the center of the invaginating RP (supplementary material Fig. S1C-E). We compared the expression domains of previously reported RP markers such as *Bmp7*, *Zic2*, *Otx2* and *Wnt7b* with the domain of RA activity. Although the expression domain of *Bmp7* coincided perfectly with that of RA activity (Fig. 1T,U), the expression of *Zic2* extended beyond it on either side (Fig. 1T,V). In fact, *Bmp7* was expressed in an anterior-posterior gradient similar to that of *Raldh2* and *Cyp26a1* (supplementary material Fig. S2A-I). However, the expression of *Otx2* and *Wnt7b* coincided more with that of *Cyp26a1* (Fig. 1R,W,X).

The central region of the mouse forebrain RP reportedly exhibits low proliferation and high apoptosis (Furuta et al., 1997). Indeed, we found that in the chick forebrain RP, the domain of RA activity is largely devoid of proliferating cells, as assessed by phosphohistone 3 (PH3) immunohistochemistry (Fig. 1T,S), whereas the neuroepithelium on either side has a much higher number of proliferating cells. However, the number of apoptotic cells in the forebrain RP of the chick between HH18 and HH22 was insignificant (data not shown). Thus, the domain of active RA signaling in the forebrain RP is characterized by the expression of *Bmp7* and *Zic2*, and by a low proliferation profile. We will henceforth refer to this domain of active RA signaling as the dorsal forebrain midline (DFM).

#### Activation of RA signaling in ectopic locations in the chick forebrain is sufficient for inducing some characteristics of the DFM

To shed light on the possible function(s) of RA signaling in the DFM, we electroporated the pCIG-VP16-RAR $\alpha$ -IRES-nGFP construct in the chick dorsal forebrain, which would lead to expression of VP16-RAR $\alpha$ , a constitutively active RA receptor (Novitsch et al., 2003). The ability of VP16-RAR $\alpha$  to activate RA signaling independent of RA was demonstrated by co-electroporating the RA reporter pRARE-AP with pCIG-VP16-RAR $\alpha$ -IRES-nGFP (supplementary material Fig. S3E,F). Electroporation of pCIG-VP16-RAR $\alpha$ -IRES-nGFP at HH10 in the dorsal forebrain resulted in perturbed dorsal-ventral (D-V) patterning and loss of expression of RP markers at HH22 (supplementary material Fig. S4A-H'). This was similar to a previous study where implantation of a RA-soaked bead in HH10 chick forebrain led to defects in D-V patterning manifested as adoption of intermediate identity by the dorsal forebrain (Marklund et al., 2004). Thus, we propose that correct establishment of the D-V identity dictated by appropriate RA signaling in the forebrain is a prerequisite for the establishment of the RP and DFM in the chick forebrain.

To circumvent the forebrain defects caused by early activation of RA signaling, we electroporated pCAG-VP16-RAR $\alpha$  in the lateral forebrain at HH22, when D-V identity of the forebrain has been already established. At HH24, we examined the expression of the

RP and DFM markers, namely *Bmp7*, *Zic2*, *Wnt7b* and *Otx2* in the pCAG-VP16RAR $\alpha$  and control electroporated embryos. We observed ectopic expression of *Bmp7* and *Zic2* but not *Otx2* and *Wnt7b* in the lateral regions of the pCAG-VP16RAR $\alpha$  electroporated forebrains (Fig. 2B-D''). This is expected because only the expression of *Bmp7* and *Zic2* overlap with the domain of active RA signaling, whereas the expression of *Wnt7b* and *Otx2* overlap with that of *Cyp26a1*. Another feature of the DFM region is the low number of proliferating cells (Fig. 1S). In keeping with this, we observed an 80% reduction in the number of PH3-positive cells in the lateral regions of the forebrains electroporated with the pCAG-VP16RAR $\alpha$  when compared with the control (Fig. 2G-I). However, we did not observe any ectopic invagination in the lateral forebrain, suggesting that constitutive activation of RA signaling is sufficient to induce some but not all features of the DFM in ectopic locations.

### RA signaling regulates the invagination of the chick RP

To ascertain the necessity of RA signaling for the establishment of the DFM, we electroporated the pCAGEN-RAR403 construct encoding the dominant-negative RAR receptor (RAR403) (Novitsch et al., 2003; Sen et al., 2005) in the chick dorsal forebrain. The ability of this construct to block RA signaling was confirmed by co-electroporating pCAGEN-RAR403 with the RA reporter pRARE-AP in the dorsal chick forebrain (supplementary material Fig. S3A-D). Electroporation of pCAGEN-RAR403 in the dorsal forebrain at HH10 resulted in a flat forebrain RP with no invagination at HH22 ( $n=5/8$ ). Subsequently, the analysis of RP and DFM marker expression revealed a loss of *Bmp7* expression ( $n=3/5$ ), while the expression domains of *Zic2*, *Wnt7b* and *Otx2* were found to be greatly reduced in size when compared with that in controls ( $n=4/5$ ) (Fig. 3A-E'). Moreover, we found a sixfold increase in the percentage of PH3-positive cells in the

pCAGEN-RAR403-electroporated region when compared with controls (Fig. 3F-H). RAR403 may have indirect effects due to sequestering of RXR, a common co-receptor for other nuclear hormone signaling pathways such as thyroid hormone (TR). Thus, as a control, a dominant-negative thyroid hormone receptor (dnTR) (Sen et al., 2005) was expressed in the RP at HH10. This did not lead to perturbations in the invagination or development of the RP (supplementary material Fig. S5). Furthermore, to rule out the possibility that the observed phenotype is due to off-target effects of RAR403, we mis-expressed *Cyp26a1* in the developing chick RP at HH10. This resulted in a completely flat forebrain roof plate at HH22 (Fig. 3I-S), similar to that observed with electroporation of pCAGEN-RAR403. Thus, from the phenotypes obtained with two independent methods of reducing RA signaling, we concluded that RA plays a specific role in regulating the invagination of the chick forebrain RP.

RA has been implicated in various aspects of early forebrain development through studies primarily conducted in chick. VAD quail embryos, deficient in RA from the beginning of development, exhibit a lack of RP invagination (Halilagic et al., 2003) with features similar to a specific subtype of holoprocencephaly (Simon et al., 2002; Fernandes et al., 2007). As RA is a caudalizing factor, this may be attributed to abnormal A-P patterning during gastrulation (Chen et al., 1994; Halilagic et al., 2003). Although these studies implicated RA as a regulator of the separation of telencephalic vesicles, the specific role of RA signaling in this context was not known. Through this study, we have identified the specific event regulated by RA, which is the invagination of the chick forebrain RP.

Contrary to the defects observed in the present study and in the VAD quail embryos, RP invagination defects were never observed in mouse mutants lacking either *Rdh10* (Sandell et al., 2007) or both *Raldh2* and *Raldh3*, the major sources of RA in the forebrain

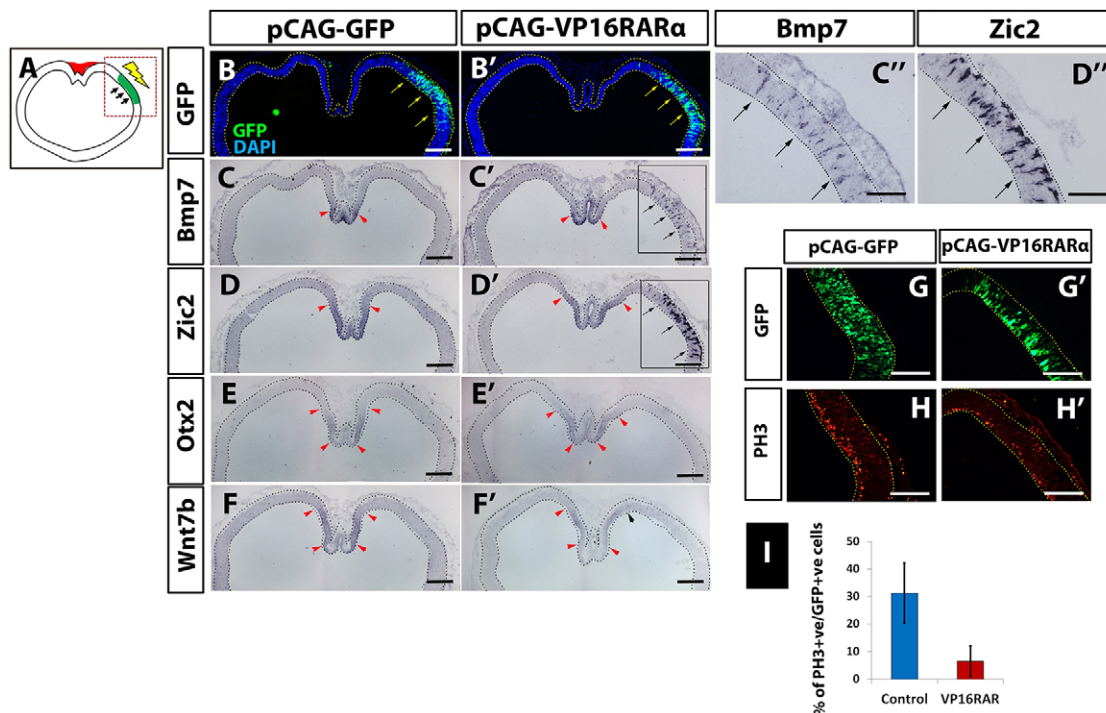

**Fig. 2. Effects of ectopic activation of RA signaling in the chick lateral forebrain.** (A) Schematic of coronal section of HH21 electroporated forebrain (electroporated area in green). Expression of RP/DFM markers (C-F'; C'', D'' are higher magnification images of boxed areas in C', D') and PH3 immunohistochemistry (G-H') and quantification (I) of forebrains electroporated with pCAG-GFP or pCAG-VP16RAR $\alpha$ . Data are mean $\pm$ s.d. Scale bars: 200  $\mu$ m in B-F'; 100  $\mu$ m in C'', D'', G-H'.

(Molotkova et al., 2007). This may reflect the differences between mammals and birds with respect to developmental events regulated by RA. In keeping with this, a specific domain of RA signaling has never been observed in the center of the mouse RP (Rajaii et al., 2008). In addition, we did not detect any source (Raldh) or sink (Cyp26) of RA in the RP of the early mouse forebrain (data not shown). This explains the absence of forebrain RP invagination defects in *Rdh10* knockout mice, which lack all RA signaling in the forebrain (Sandell et al., 2007). Thus, RA appears to be a chick-specific regulator of forebrain RP invagination. Nonetheless, this study highlights the importance

of the dorsal mesenchyme in regulating the morphogenesis of forebrain RP in both species. In agreement with this, a recent report described the failure of RP invagination upon reduced dorsal mesenchymal expansion (Choe et al., 2014). This may be attributed either to a decreased number of mesenchymal cells applying a lesser downward force on the underlying RP or to the decrease in secreted signal(s) emanating from the mesenchyme that direct RP invagination. We propose that such a dorsal mesenchyme-derived signal is likely to be RA in the chick, whereas the identity of such a signal, if any, in the mouse is yet to be discovered. Thus, through this study we have uncovered a

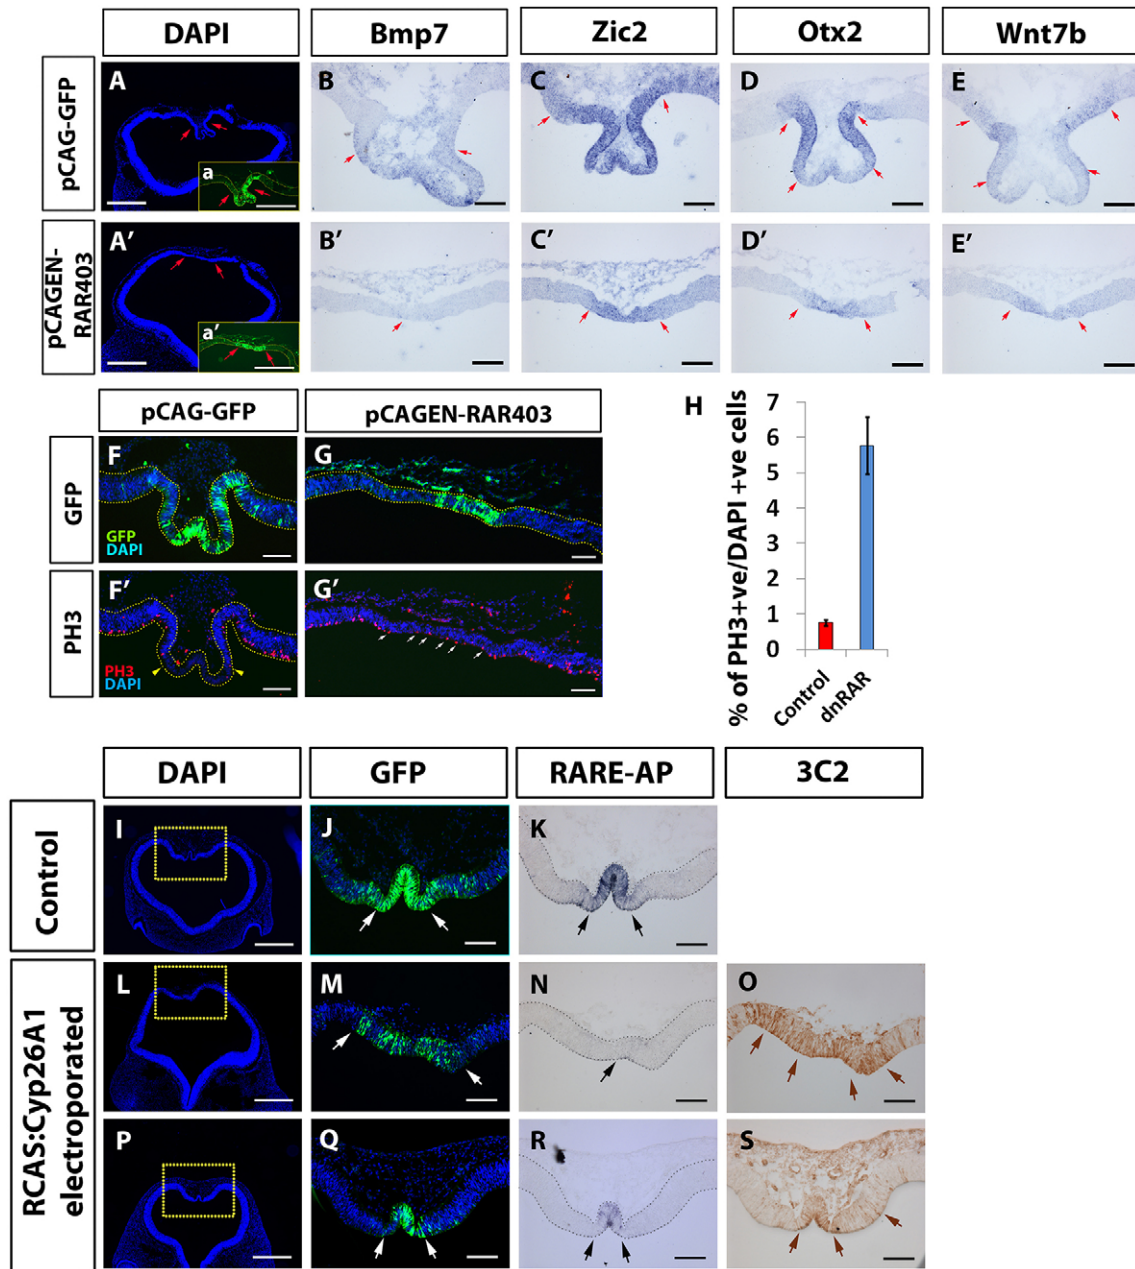

**Fig. 3. Effects of inhibition of RA signaling in the chick forebrain RP.** DAPI-stained images of pCAG-GFP (A) and pCAGEN-RAR403 (A') electroporated HH22 forebrains (a,a' show GFP electroporated region). Expression of RP/DFM markers (B-E') and PH3 immunohistochemistry (F-G', arrows) and quantification (H) in forebrains electroporated with pCAG-GFP or pCAGEN-RAR403. Data are mean±s.d. DAPI-stained images of forebrains at HH22 electroporated with pCAG-GFP+ pRARE-AP (I) and RACS-Cyp26A1+ pRARE-AP (L,P). Extent of electroporation denoted by GFP expression in J,M,Q. Status of RA signaling indicated by AP staining in control (K) and RCAS-Cyp26A1 electroporated (N,R) forebrains. Differential levels of RCAS-Cyp26A1 misexpression indicated by 3C2 staining (O,S). Scale bars: 500 µm in A,A',a,a',I,L,P; 100 µm in B-E',F-G',J,K,M,O,Q-S.

novel mechanism by which forebrain RP morphogenesis can be regulated.

### The inhibition of RA signaling in the bilateral domains flanking the chick DFM is essential for choroid plexus development

The bilateral domains of *Cyp26a1* expression flanking the DFM at HH22 later form the choroid plexus (ChP). We observed that the expression of *Cyp26a1* persists until the advent of choroid plexus differentiation at HH2, and its expression colocalizes with a marker of ChP differentiation, transthyretin (Ttr) (Fig. 4B-D). Although *Cyp26a1* and Ttr are expressed in overlapping domains at HH29, the onset of *Cyp26a1* expression precedes Ttr expression by 3 days. This indicates that inhibition of RA signaling is probably required from the earliest stage of ChP development. Indeed, when we forcibly activated RA signaling in the domain of *Cyp26a1* expression at HH22 by electroporating pCAG-VP16RAR $\alpha$ , we observed absence of Ttr expression in the electroporated region at HH29 (Fig. 4F-G'). Thus, our data suggest that RA signaling must be inhibited in the bilateral regions flanking the DFM to ensure proper ChP development. There are several possible mechanisms by which RA may negatively influence ChP development. At the progenitor stage, RA may influence the fate determination of the ChP cells by altering the Hes versus neurogenin 2 balance, which has been reported to influence the neural versus non-neural fate choice in the mammalian forebrain (Imayoshi et al., 2008). However, it is not known whether a similar Hes-neurogenin 2 system functions in the chick forebrain. Alternatively, RA may affect cell survival by modulating *Otx2*, a major determinant of differentiation and survival of mammalian ChP cells (Johansson et al., 2013). However, this appears to be unlikely as *Otx2* expression was not altered when RA signaling was activated in the bilateral domains flanking the DFM in this study (data not shown). RA may also influence ChP development through affecting BMP signaling, as the absence of BMP signaling leads to failure of ChP development in mice (Hébert et al., 2002; Fernandes et al., 2007). In keeping with this, we observed altered levels of *Bmp7* expression in

the DFM upon modulation of the RA signaling, indicating the possible interaction between RA and BMP signaling pathways.

In this study, we have discovered chick-specific novel functions of RA during forebrain RP morphogenesis and ChP development. Our data, together with a previous study in the mouse, indicate that there exists a conserved theme in the invagination of the forebrain RP between different species. This involves crosstalk between the dorsal mesenchyme and the underlying forebrain RP. We have identified RA as one of the mediators of this crosstalk in the chick, whereas the identity of such a mediator in the mouse remains unknown. This study will provide the impetus for the identification of this mediator in the mouse. Furthermore, it would be informative to study the similarities and differences in the cellular and molecular bases of this invagination process between the chick and the mouse. Such comparative studies are likely to reveal how regulatory mechanisms evolved to bring about the same morphogenetic changes in different species.

## MATERIALS AND METHODS

### Fertilized chicken eggs and embryos

Fertilized chicken eggs were obtained from Santosh's Poultry Farm (Kanpur, India) and CARI (Bareilly, India). Eggs were incubated at 38°C in a humidified incubator until the desired HH stages (Hamburger and Hamilton, 1951).

### Plasmids

Constructs used were: (1) pCIG-VP16RAR $\alpha$ -IRES-nGFP (Addgene; Novitch et al., 2003); (2) pCAG-VP16RAR $\alpha$ ; (3) pCAGEN-RAR403, (4) pCAG-GFP, (5) RCAS-dnTR and (6) RCAS-*Cyp26a1* (gifts from Prof. Constance Cepko, Harvard Medical School, Boston, MA, USA); (7) pCIG vector (a gift from Dr Axia Morales, Instituto Cajal, Madrid, Spain); and (8) pRARE-AP. See methods in the supplementary material for constructs (2) and (8).

### In ovo electroporation and alkaline phosphatase staining

*In ovo* electroporation of HH10 and HH22 chick forebrains as well as AP staining on frozen sections of pRARE-AP electroporated forebrains

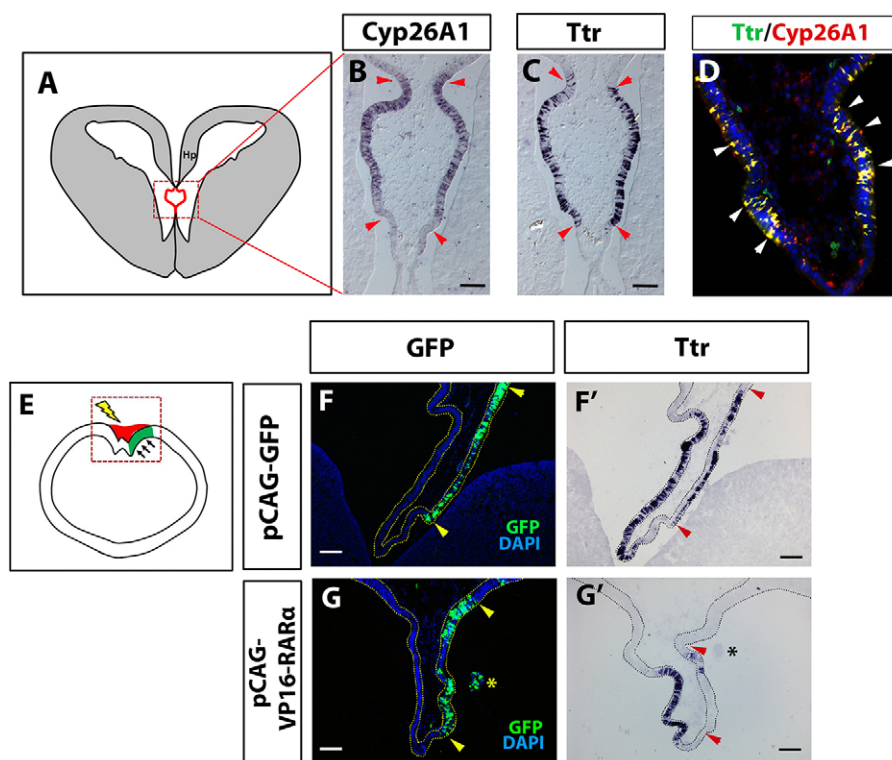

**Fig. 4. The effect of activation of RA signaling on choroid plexus development.** (A) Schematic of coronal section of HH29 forebrain depicting ChP (red line). Expression of *Cyp26a1* and Ttr in ChP epithelium: B, C are serial sections (red arrowheads); D shows double fluorescent RNA *in situ* hybridization (white arrowheads). Expression of Ttr on transverse sections of HH29 forebrain electroporated medially at HH22 (schematic in E) with pCAG-GFP (F, F', arrowheads) or pCAG-VP16RAR $\alpha$  (G, G', arrowheads). Scale bars: 100  $\mu$ m.

were carried out according to protocols described in the methods in the supplementary material. Imaging was carried out using a Leica stereomicroscope (DM5000B) equipped with a DFC500 camera.

### RNA *in situ* hybridization and immunohistochemistry

*In situ* hybridization was carried out according to established protocols (Gupta et al., 2012). RNA probes were prepared from the following cDNA clones: (1) *Bmp7*, *Meis1* and *Wnt7b* (gifts from Prof. Clifford Tabin, Harvard Medical School, Boston, MA, USA); (2) *Raldh2* and *Cyp26a1* (gifts from Prof. Constance Cepko); (3) *Zic2*, *Cyp26c1* and *Otx2* (RT-PCR amplified); and (4) transthyretin (*Ttr*) (ChEST 735F8, Source Bioscience). For PH3 immunohistochemistry, anti-PH3 (Sigma, H0412, 1:500 dilution) and anti-rabbit Alexa fluor 594 (Jackson ImmunoResearch Lab, 111-585-045; 1:250) antibodies were used. 3C2 staining was performed as described in the methods in the supplementary material. Imaging was carried out using a Leica stereomicroscope (DM5000B) equipped with a DFC500 camera.

### Acknowledgements

We thank Dr Raj Lather, Dr Paul O'Neill and Dr Stephen Freeman at the CDB (Kobe, Japan) for *in ovo* electroporation training, and Dr A. Bandyopadhyay (IIT Kanpur, India) for critical reading of the manuscript.

### Competing interests

The authors declare no competing or financial interests.

### Author contributions

S.G. and J.S. designed the experiments. S.G. performed experiments and data analysis. The manuscript was prepared and edited by S.G. and J.S.

### Funding

This work was supported by the Department of Science and Technology (DST), Government of India [SR/SO/AS-71/2006 to S.J.]. S.G. is a Senior Research Fellow from the Council of Scientific and Industrial Research (CSIR), Government of India.

### Supplementary material

Supplementary material available online at <http://dev.biologists.org/lookup/suppl/doi:10.1242/dev.122390/-/DC1>

### References

- Chatzi, C., Cunningham, T. J. and Duester, G. (2013). Investigation of retinoic acid function during embryonic brain development using retinaldehyde-rescued *Rdh10* knockout mice. *Dev. Dyn.* **242**, 1056-1065.
- Chen, Y., Huang, L. and Solorsh, M. (1994). A concentration gradient of retinoids in the early *Xenopus laevis* embryo. *Dev. Biol.* **161**, 70-76.
- Cheng, X., Hsu, C.-m., Currle, D. S., Hu, J. S., Barkovich, A. J. and Monuki, E. S. (2006). Central roles of the roof plate in telencephalic development and holoprosencephaly. *J. Neurosci.* **26**, 7640-7649.
- Choe, Y., Zarbalis, K. S. and Pleasure, S. J. (2014). Neural crest-derived mesenchymal cells require Wnt signaling for their development and drive invagination of the telencephalic midline. *PLoS ONE* **9**, e86025.
- Crossley, P. H., Martinez, S., Ohkubo, Y. and Rubenstein, J. L. R. (2001). Coordinate expression of *Fgf8*, *Otx2*, *Bmp4*, and *Shh* in the rostral prosencephalon during development of the telencephalic and optic vesicles. *Neuroscience* **108**, 183-206.
- Currle, D. S., Cheng, X., Hsu, C.-M. and Monuki, E. S. (2005). Direct and indirect roles of CNS dorsal midline cells in choroid plexus epithelia formation. *Development* **132**, 3549-3559.
- Fernandes, M., Gutin, G., Alcorn, H., McConnell, S. K. and Hébert, J. M. (2007). Mutations in the BMP pathway in mice support the existence of two molecular classes of holoprosencephaly. *Development* **134**, 3789-3794.
- Furuta, Y., Piston, D. W. and Hogan, B. L. (1997). Bone morphogenetic proteins (BMPs) as regulators of dorsal forebrain development. *Development* **124**, 2203-2212.
- Grove, E. A., Tole, S., Limon, J., Yip, L. and Ragsdale, C. W. (1998). The hem of the embryonic cerebral cortex is defined by the expression of multiple Wnt genes and is compromised in *Gli3*-deficient mice. *Development* **125**, 2315-2325.
- Gupta, S., Maurya, R., Saxena, M. and Sen, J. (2012). Defining structural homology between the mammalian and avian hippocampus through conserved gene expression patterns observed in the chick embryo. *Dev. Biol.* **366**, 125-141.
- Halilagic, A., Zile, M. H. and Studer, M. (2003). A novel role for retinoids in patterning the avian forebrain during presomite stages. *Development* **130**, 2039-2050.
- Halilagic, A., Ribes, V., Ghyselinck, N. B., Zile, M. H., Dollé, P. and Studer, M. (2007). Retinoids control anterior and dorsal properties in the developing forebrain. *Dev. Biol.* **303**, 362-375.
- Hamburger, V. and Hamilton, H. L. (1951). A series of normal stages in the development of the chick embryo. *J. Morphol.* **88**, 49-92.
- Hébert, J. M., Mishina, Y. and McConnell, S. K. (2002). BMP signaling is required locally to pattern the dorsal telencephalic midline. *Neuron* **35**, 1029-1041.
- Imayoshi, I., Shimogori, T., Ohtsuka, T. and Kageyama, R. (2008). *Hes* genes and neurogenin regulate non-neural versus neural fate specification in the dorsal telencephalic midline. *Development* **135**, 2531-2541.
- Johansson, P. A., Irmeler, M., Acampora, D., Beckers, J., Simeone, A. and Götz, M. (2013). The transcription factor *Otx2* regulates choroid plexus development and function. *Development* **140**, 1055-1066.
- Klingensmith, J., Matsui, M., Yang, Y.-P. and Anderson, R. M. (2010). Roles of bone morphogenetic protein signaling and its antagonism in holoprosencephaly. *Am. J. Med. Genet. C Semin. Med. Genet.* **154C**, 43-51.
- Marklund, M., Sjödal, M., Beehler, B. C., Jessell, T. M., Edlund, T. and Gunhaga, L. (2004). Retinoic acid signalling specifies intermediate character in the developing telencephalon. *Development* **131**, 4323-4332.
- Mic, F. A., Molotkov, A., Molotkova, N. and Duester, G. (2004). *Raldh2* expression in optic vesicle generates a retinoic acid signal needed for invagination of retina during optic cup formation. *Dev. Dyn.* **231**, 270-277.
- Molotkova, N., Molotkov, A. and Duester, G. (2007). Role of retinoic acid during forebrain development begins late when *Raldh3* generates retinoic acid in the ventral subventricular zone. *Dev. Biol.* **303**, 601-610.
- Novitsch, B. G., Wichterle, H., Jessell, T. M. and Sockanathan, S. (2003). A requirement for retinoic acid-mediated transcriptional activation in ventral neural patterning and motor neuron specification. *Neuron* **40**, 81-95.
- Rajaii, F., Bitzer, Z. T., Xu, Q. and Sockanathan, S. (2008). Expression of the dominant negative retinoid receptor, *RAR403*, alters telencephalic progenitor proliferation, survival, and cell fate specification. *Dev. Biol.* **316**, 371-382.
- Roessler, E. and Muenke, M. (2010). The molecular genetics of holoprosencephaly. *Am. J. Med. Genet. C Semin. Med. Genet.* **154C**, 52-61.
- Sandell, L. L., Sanderson, B. W., Moiseyev, G., Johnson, T., Mushegian, A., Young, K., Rey, J.-P., Ma, J.-x., Staehling-Hampton, K. and Trainor, P. A. (2007). *RDH10* is essential for synthesis of embryonic retinoic acid and is required for limb, craniofacial, and organ development. *Genes Dev.* **21**, 1113-1124.
- Schneider, R. A., Hu, D., Rubenstein, J. L. R., Maden, M. and Helms, J. A. (2001). Local retinoid signaling coordinates forebrain and facial morphogenesis by maintaining *FGF8* and *SHH*. *Development* **128**, 2755-2767.
- Sen, J., Harpavat, S., Peters, M. A. and Cepko, C. L. (2005). Retinoic acid regulates the expression of dorsoventral topographic guidance molecules in the chick retina. *Development* **132**, 5147-5159.
- Simon, E. M., Hevner, R. F., Pinter, J. D., Clegg, N. J., Delgado, M., Kinsman, S. L., Hahn, J. S. and Barkovich, A. J. (2002). The middle interhemispheric variant of holoprosencephaly. *AJNR Am. J. Neuroradiol.* **23**, 151-156.
- Swindell, E. C., Thaller, C., Sockanathan, S., Petkovich, M., Jessell, T. M. and Eichele, G. (1999). Complementary domains of retinoic acid production and degradation in the early chick embryo. *Dev. Biol.* **216**, 282-296.
- Taniguchi, K., Anderson, A. E., Sutherland, A. E. and Wotton, D. (2012). Loss of *Tgif* function causes holoprosencephaly by disrupting the *SHH* signaling pathway. *PLoS Genet.* **8**, e1002524.
- Theil, T., Alvarez-Bolado, G., Walter, A. and Ruther, U. (1999). *Gli3* is required for *Emx* gene expression during dorsal telencephalon development. *Development* **126**, 3561-3571.
- Wallis, D. E., Roessler, E., Hehr, U., Nanni, L., Wiltshire, T., Richieri-Costa, A., Gillesen-Kaesbach, G., Zackai, E. H., Rommens, J. and Muenke, M. (1999). Mutations in the homeodomain of the human *SIX3* gene cause holoprosencephaly. *Nat. Genet.* **22**, 196-198.
- Warr, N., Powles-Glover, N., Chappell, A., Robson, J., Norris, D. and Arkell, R. M. (2008). *Zic2*-associated holoprosencephaly is caused by a transient defect in the organizer region during gastrulation. *Hum. Mol. Genet.* **17**, 2986-2996.
